# Supplementary material
Source: PubMed Central journal article supplement (PMC2925053)
Supplement: NIHMS199580-supplement-supplement_1.pdf [file NIHMS199580-supplement-supplement_1.pdf]

**Figure Legend**

Figure 1: Experimental model ( $P_{SVC}$ : pressure superior vena cava;  $P_{IVC}$ : pressure inferior vena cava;  $P_{RA}$ : pressure right atrium;  $P_{LA}$ : pressure left atrium;  $P_{PA}$ : pressure pulmonary artery).

Figure 2: Systemic venous pressure: increased and maintained at goal range (14-15 mmHg) in SVC (A) and IVC (B) distributions days 1 - 20. Adjusted measurement indicates adjustment required in vena caval restriction to maintain measured systemic venous pressure within goal parameters after the initial value at that time interval had been determined.

Figure 3: Cardiac index: significant reduction after intervention, with normalization by day 14. \* significant difference between experimental and control groups ( $P \leq 0.05$ ).

Figure 4: Blood volume. \* significant difference ( $P \leq 0.05$ ) from control. # significant difference ( $P \leq 0.05$ ) from baseline.

Figure 5: Serum aldosterone (A) and angiotensin II (B). \* significant difference ( $P \leq 0.05$ ) from control.

Figure E1: Heart rate in control (A) and experimental (B) groups, and cardiac index in control (C) and experimental (D) groups at baseline and after 20 minute dobutamine infusion. Study 1: one day prior to intervention; Study 2: 3 days postintervention; Study 3: 7 days postintervention; Study 4: 14 days postintervention; Study 5: 21 days postintervention. \*

1  
2  
3  
4 significant difference ( $P \leq 0.05$ ) from control. # significant difference ( $P \leq 0.05$ ) from  
5  
6 Study 1. † significant difference ( $P \leq 0.05$ ) from baseline.  
7  
8  
9

10 Figure E2: Blood oxygen saturation in SVC in control (A) and experimental (B) animals and IVC  
11 in control (C) and experimental (D) animals at baseline after 20 minute dobutamine  
12 infusion. (E) represents near-infrared spectroscopy measurements in experimental  
13 animals (n=4) at baseline after 20 minute dobutamine infusion. Study 1: one day prior to  
14 intervention; Study 2: 3 days postintervention; Study 3: 7 days postintervention; Study 4:  
15 14 days postintervention; Study 5: 21 days postintervention. \* significant difference  
16 ( $P \leq 0.05$ ) from control. # significant difference ( $P \leq 0.05$ ) from study 1 values. †  
17 significant difference ( $P \leq 0.05$ ) from baseline.  
18  
19  
20  
21  
22  
23  
24  
25  
26  
27  
28  
29  
30

31 Figure E3: Oxygen extraction in the SVC (A) and IVC (B) versus time. \* significant difference  
32 ( $P \leq 0.05$ ) from control. # significant difference ( $P \leq 0.05$ ) from baseline.  
33  
34  
35  
36  
37

38 Figure E4: Correlation between cerebral near infrared spectroscopy measurements and SVC (A)  
39 and IVC (B) blood oxygen saturation in experimental animals (n=4).  $P < 0.001$ .  
40  
41  
42  
43  
44  
45  
46  
47  
48  
49  
50  
51  
52  
53  
54  
55  
56  
57  
58  
59  
60  
61  
62  
63  
64  
65

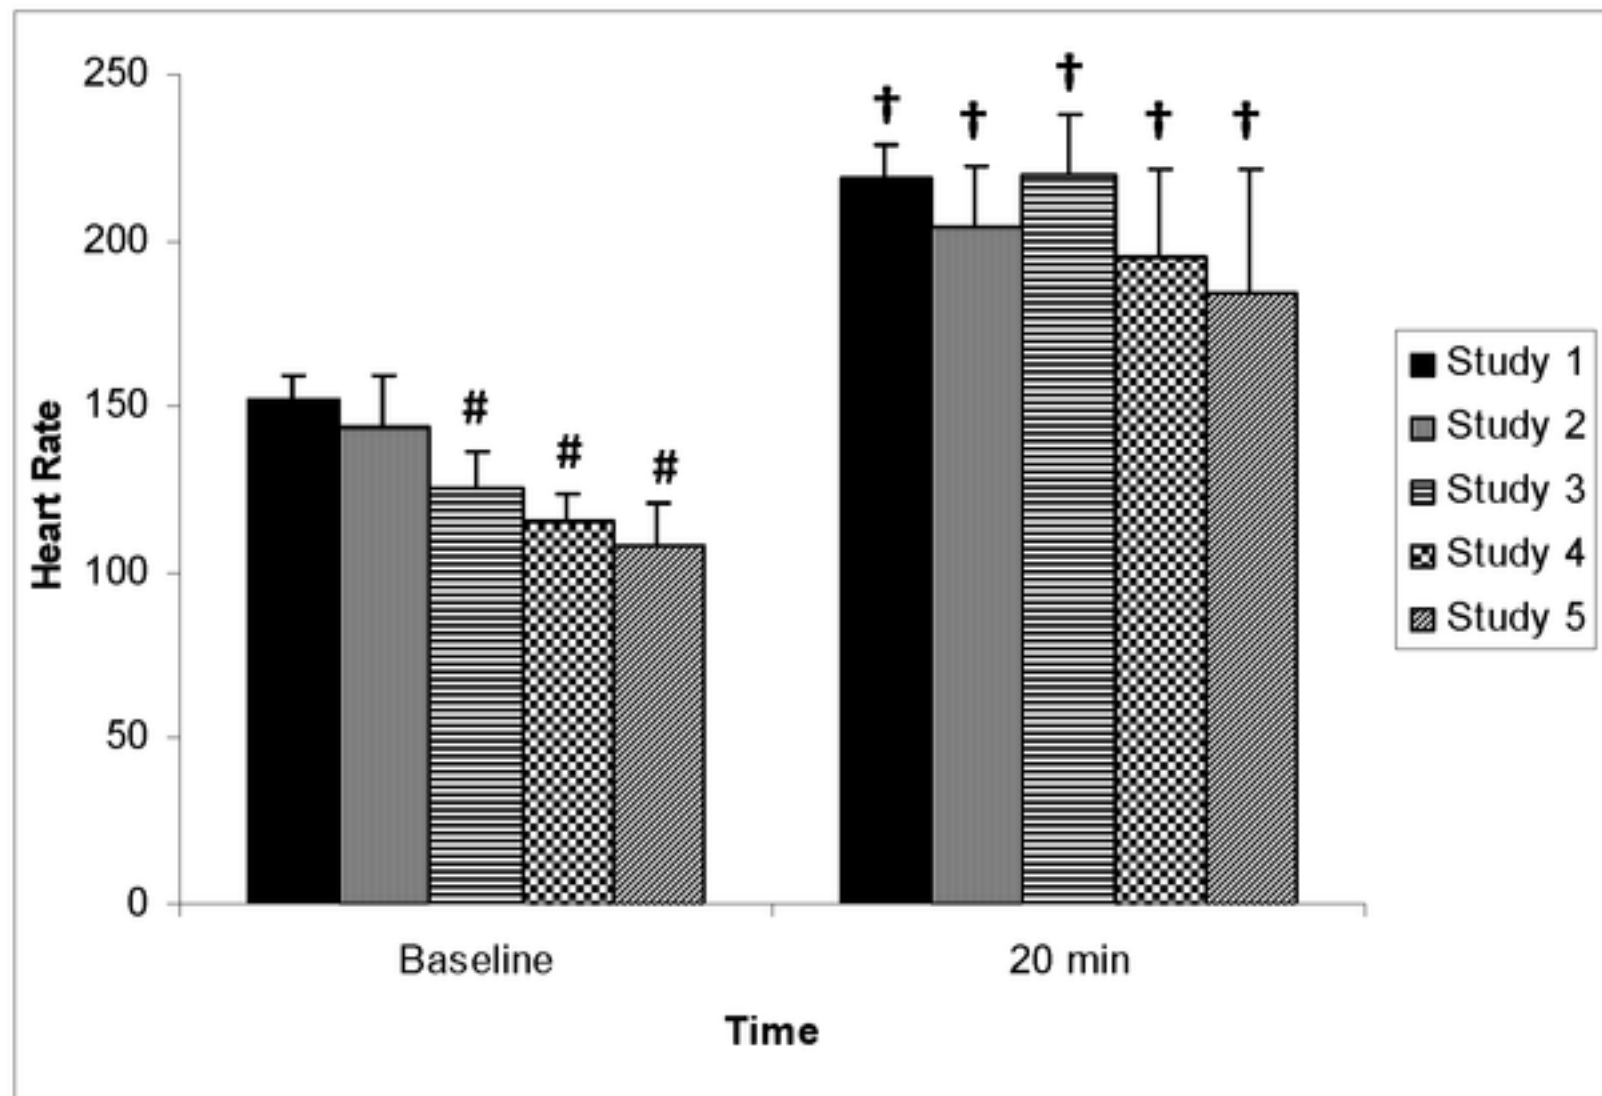

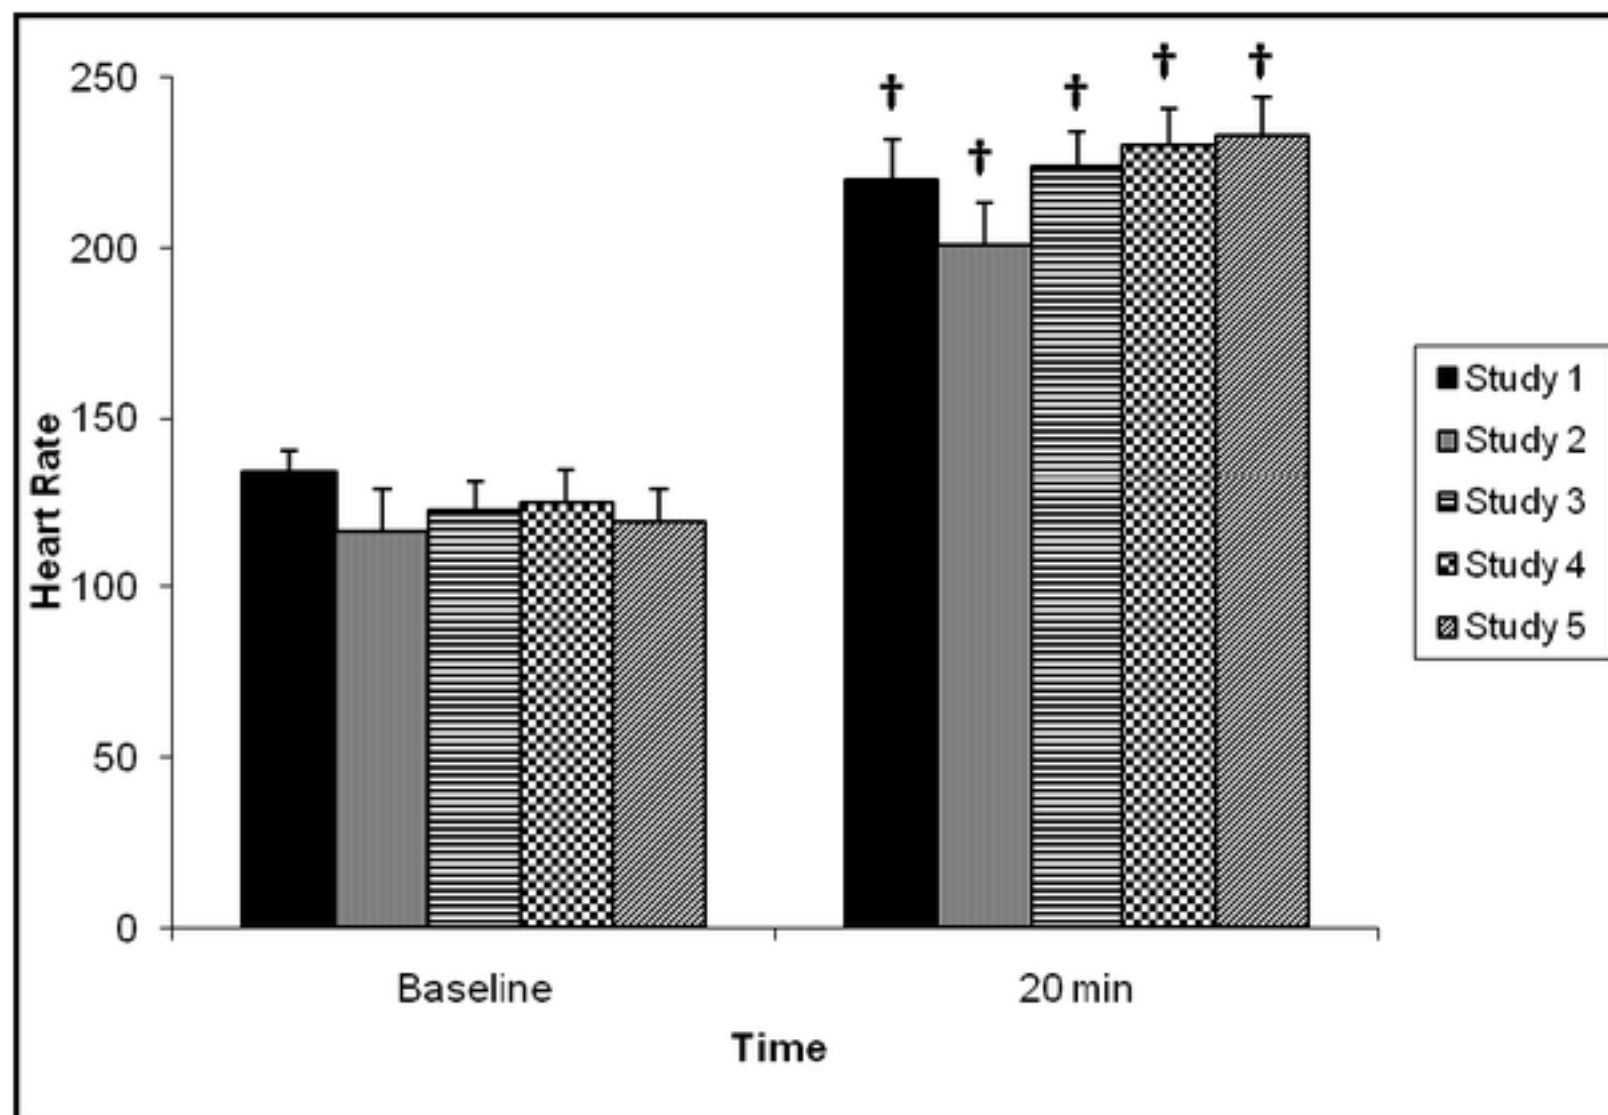

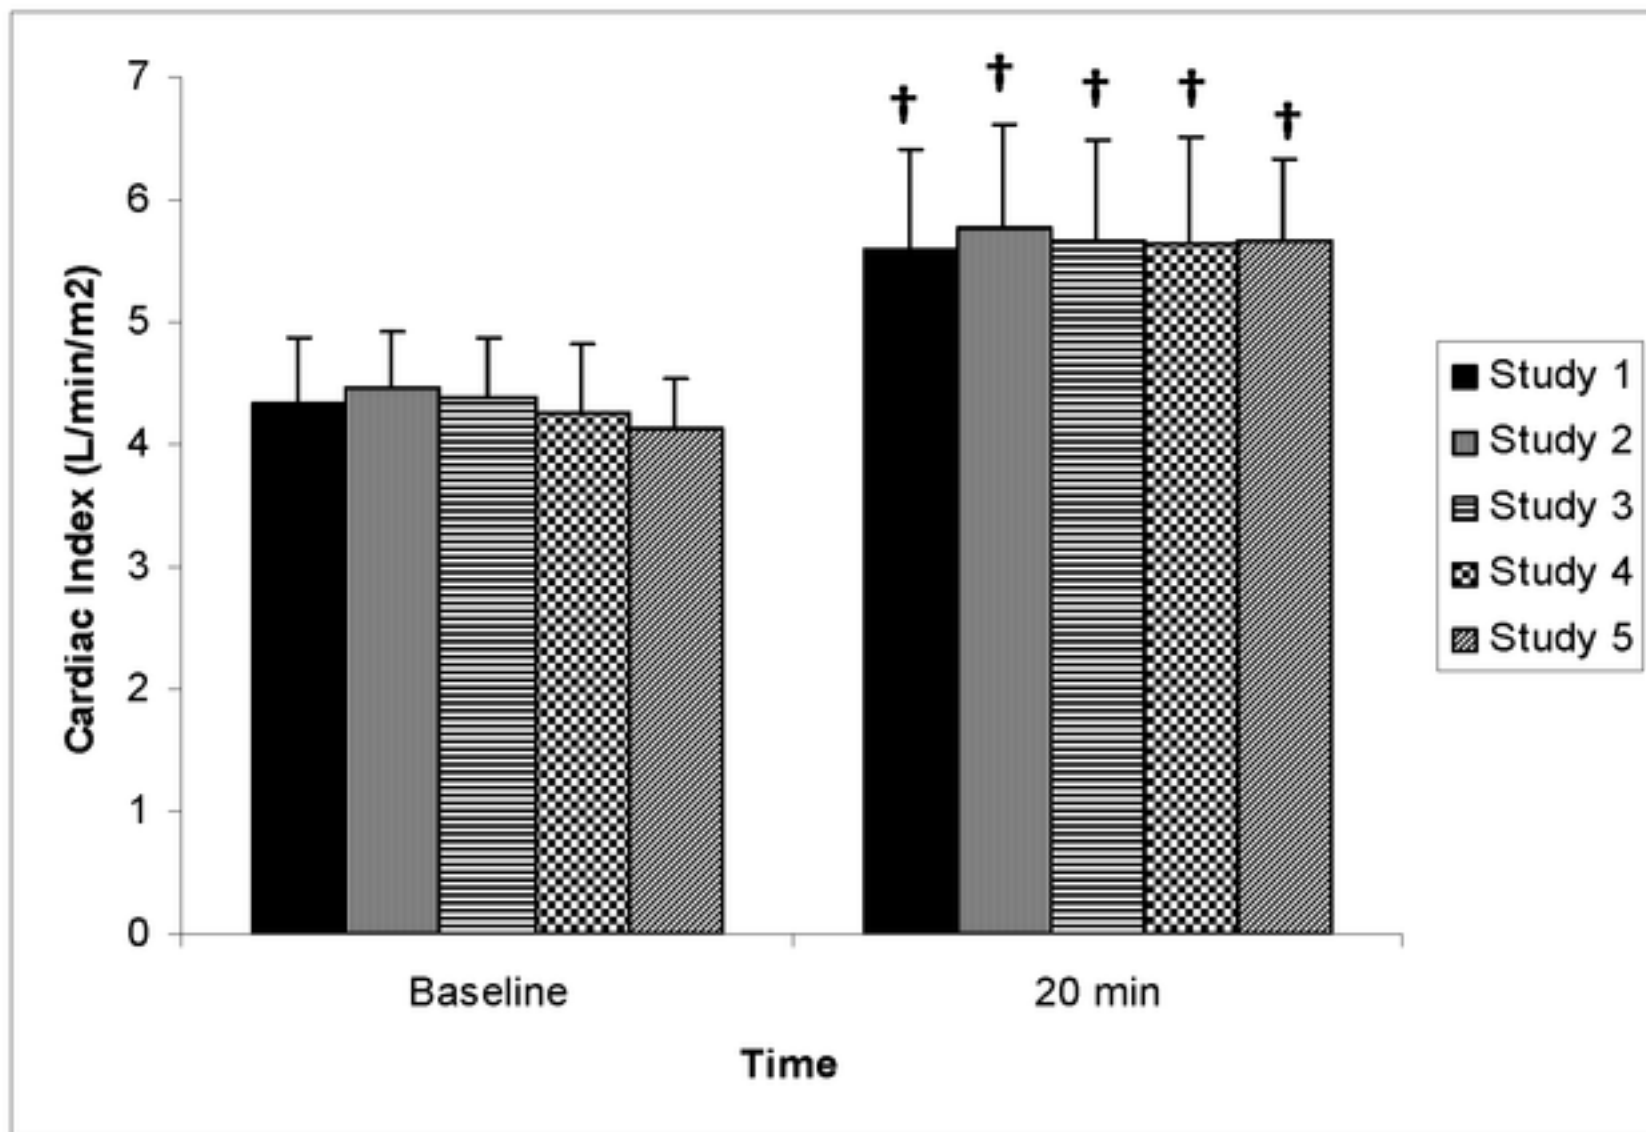

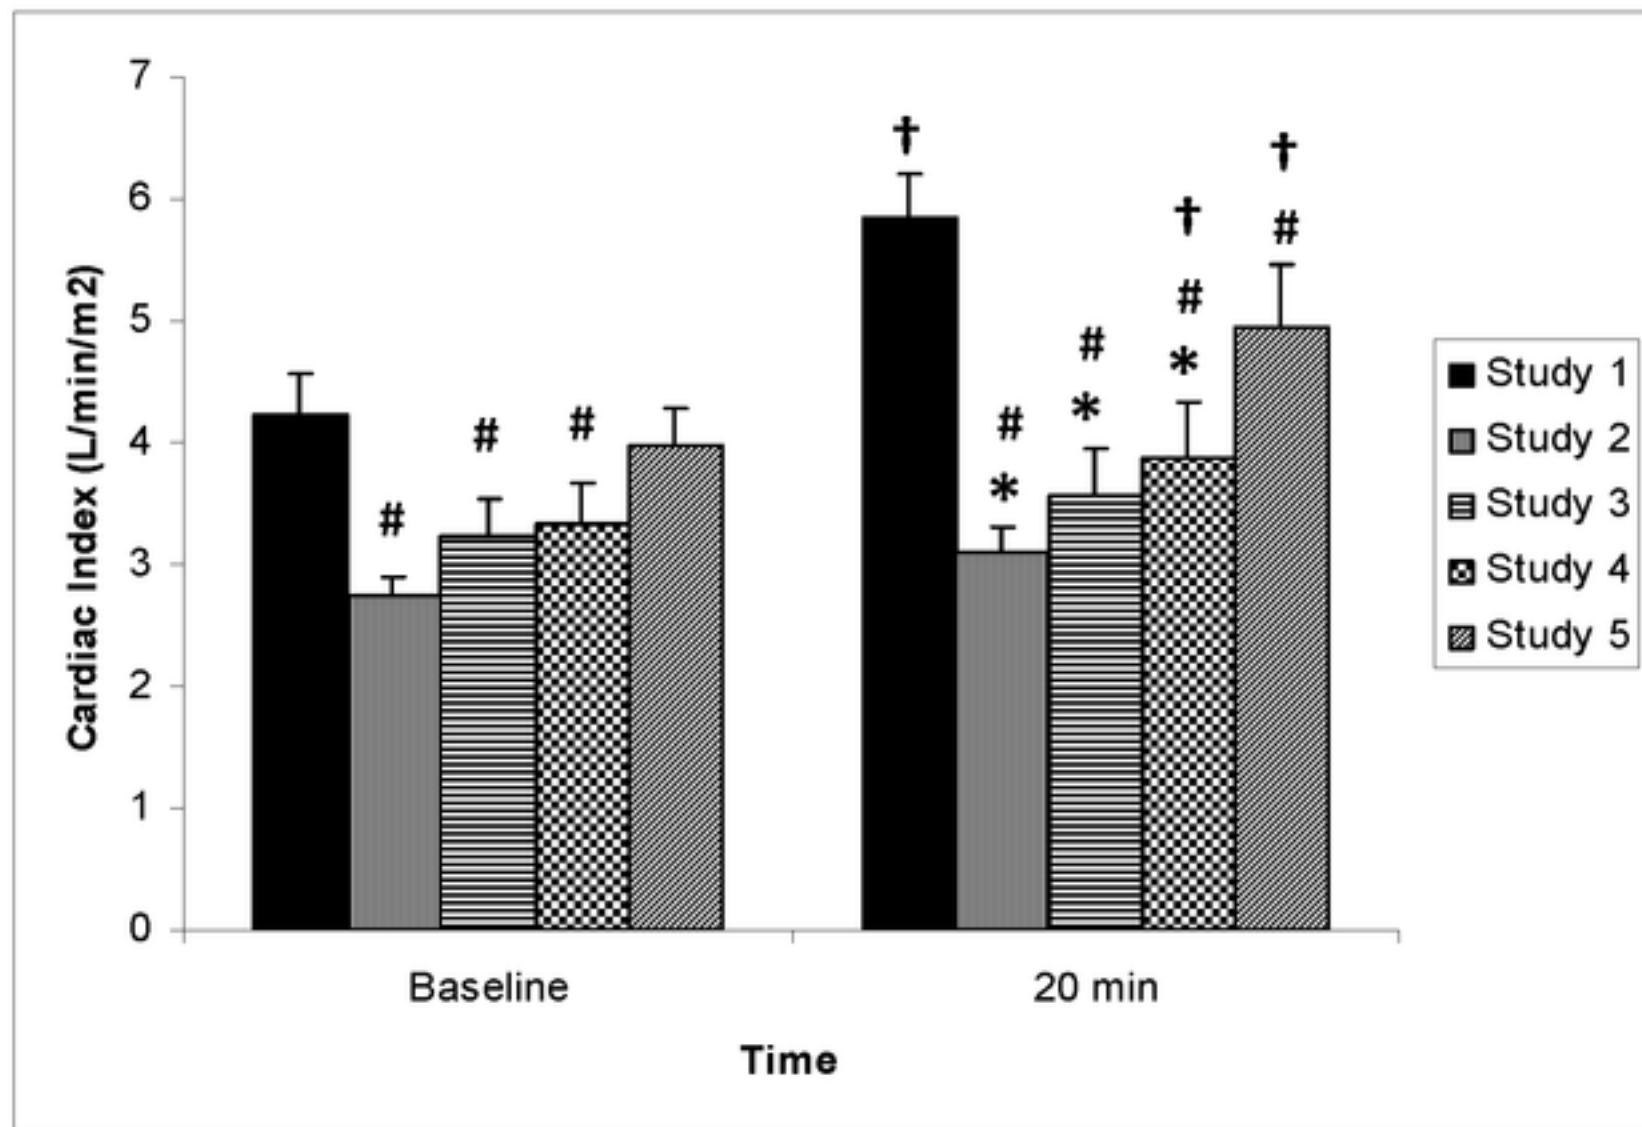

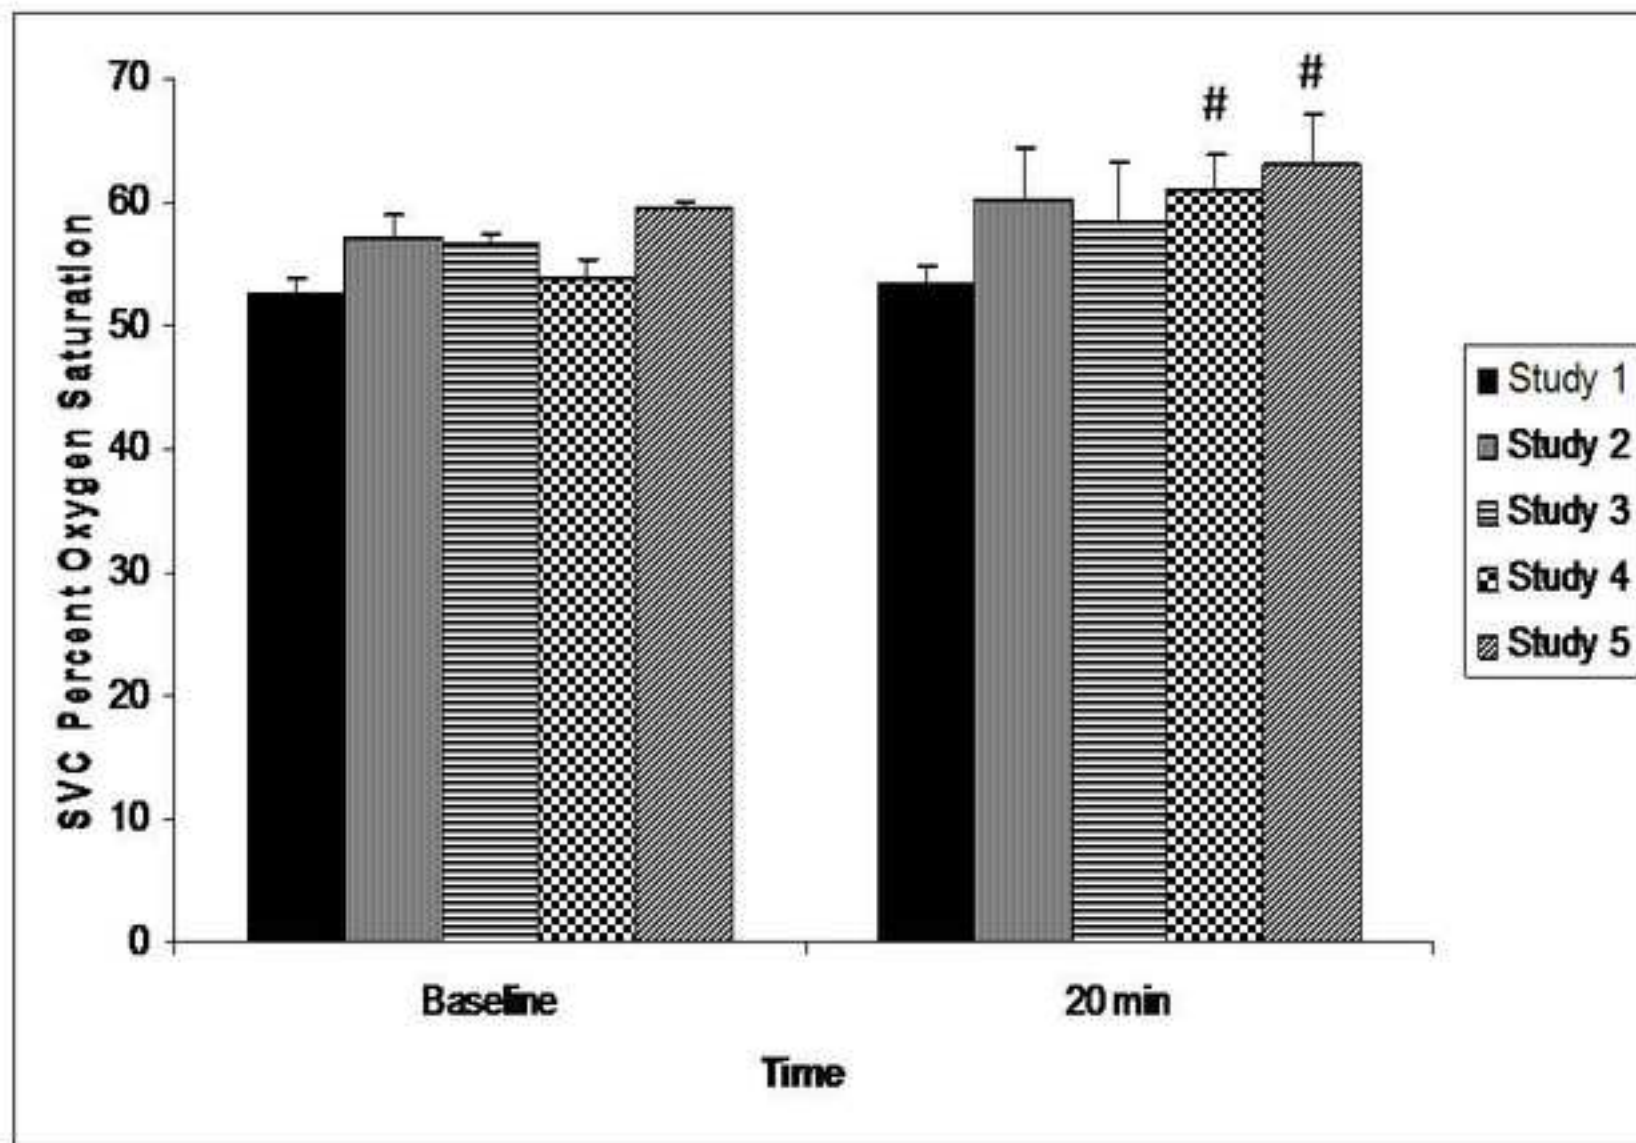

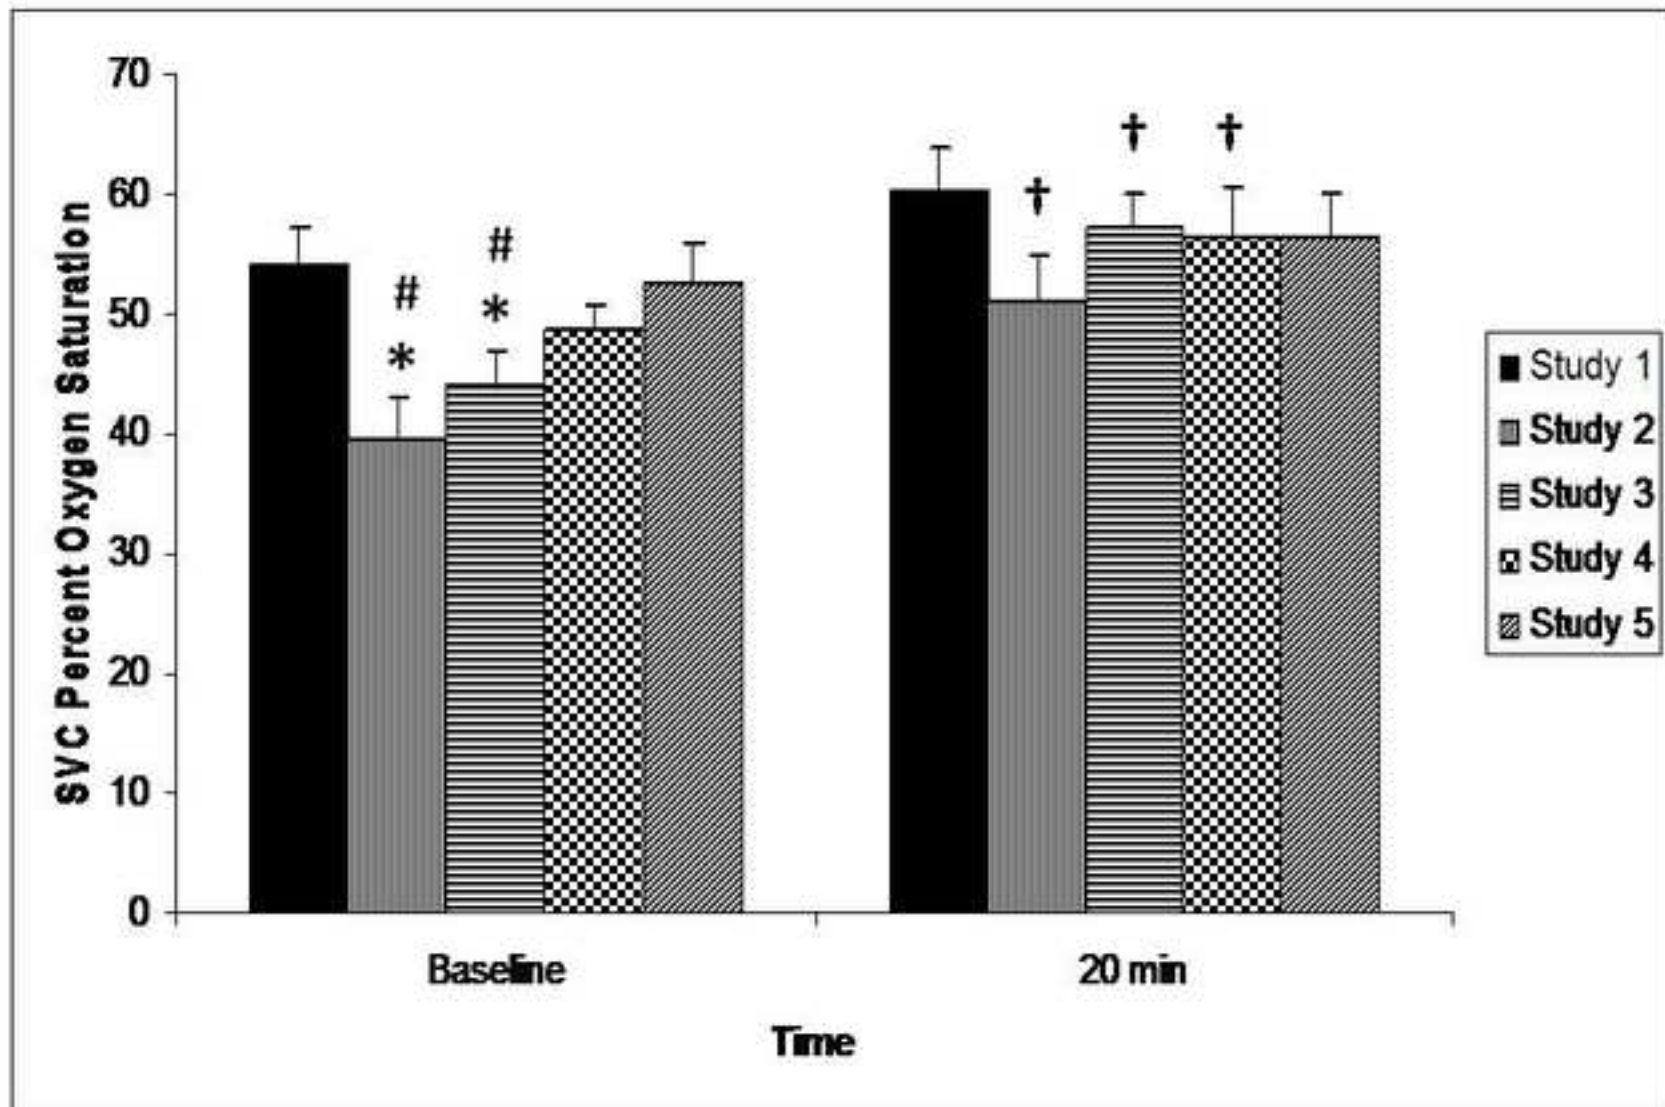



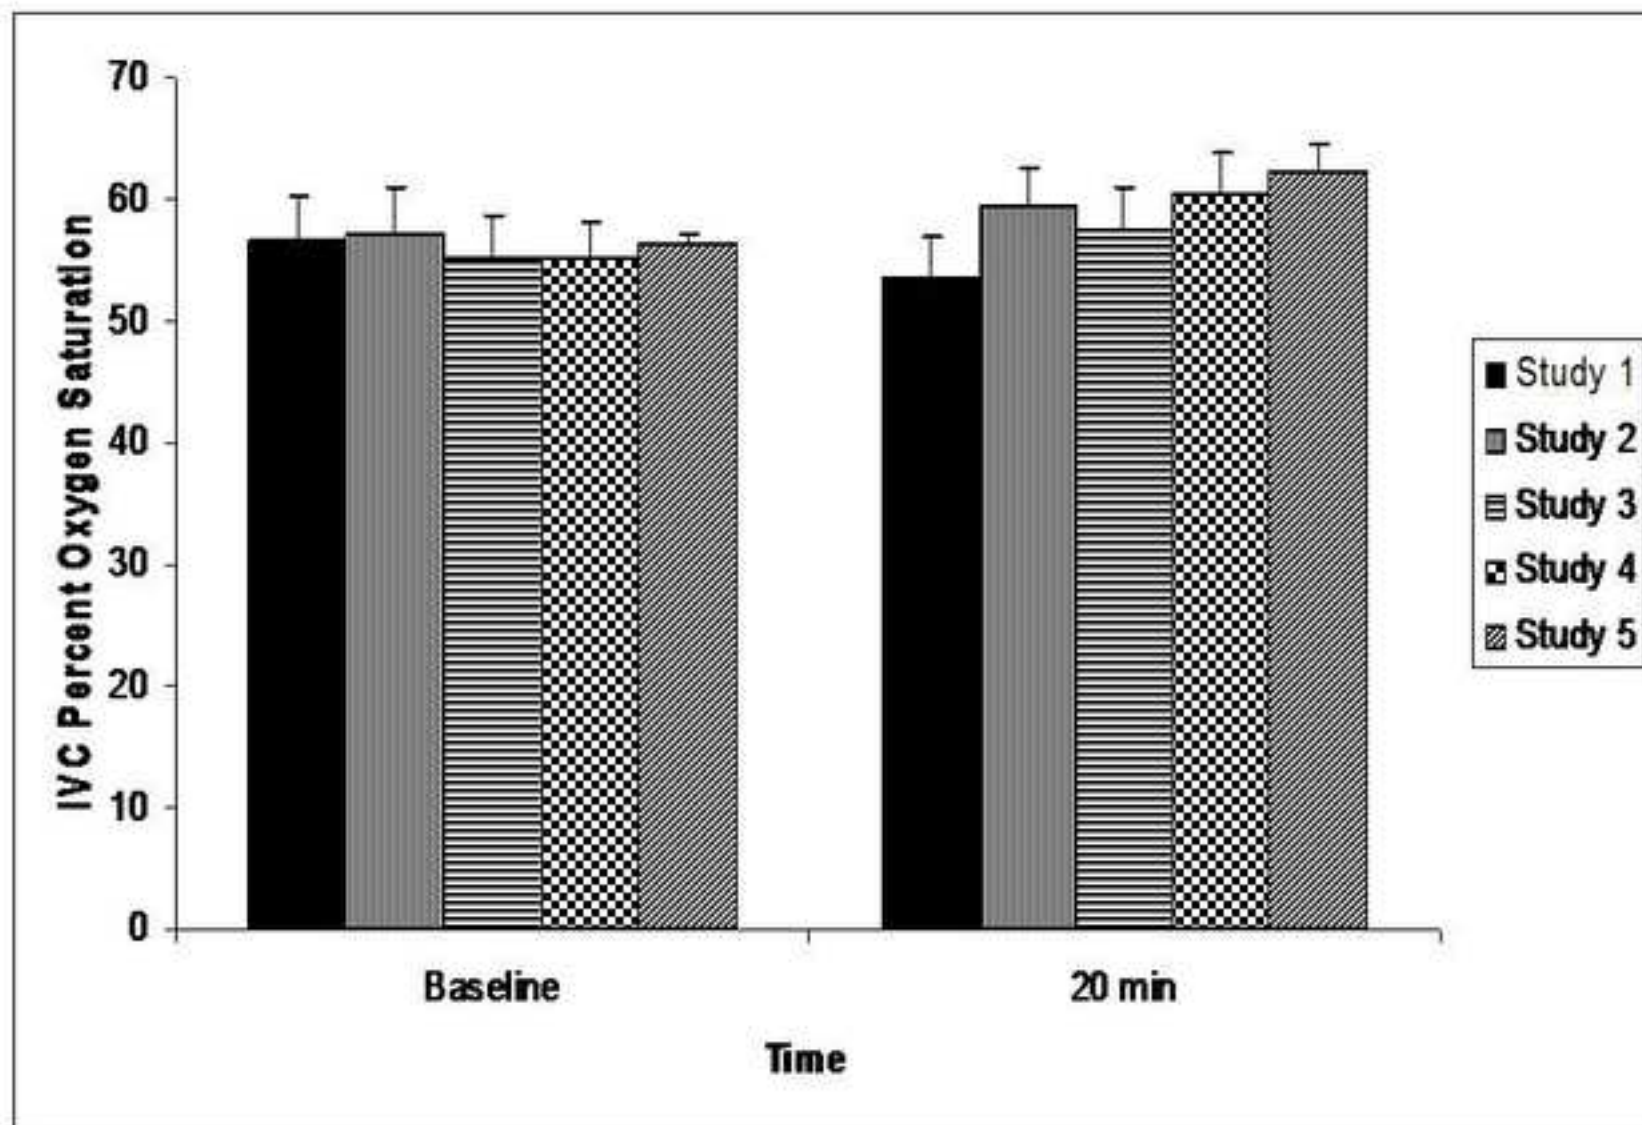

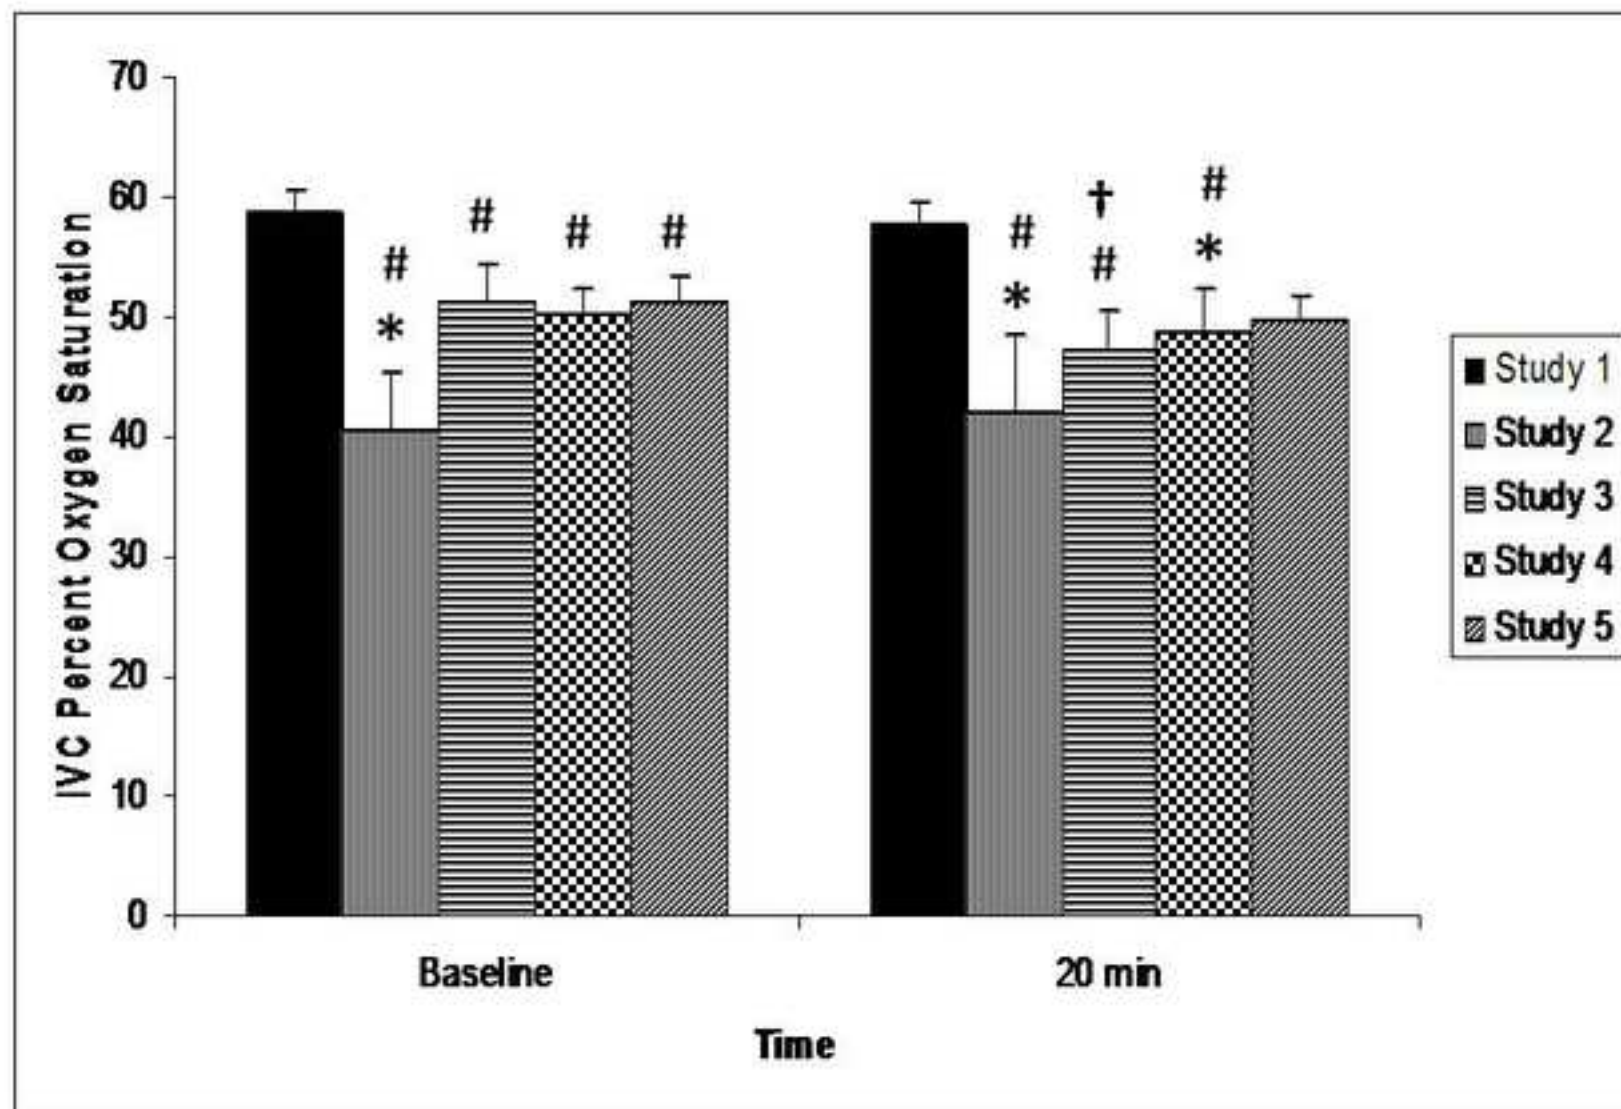

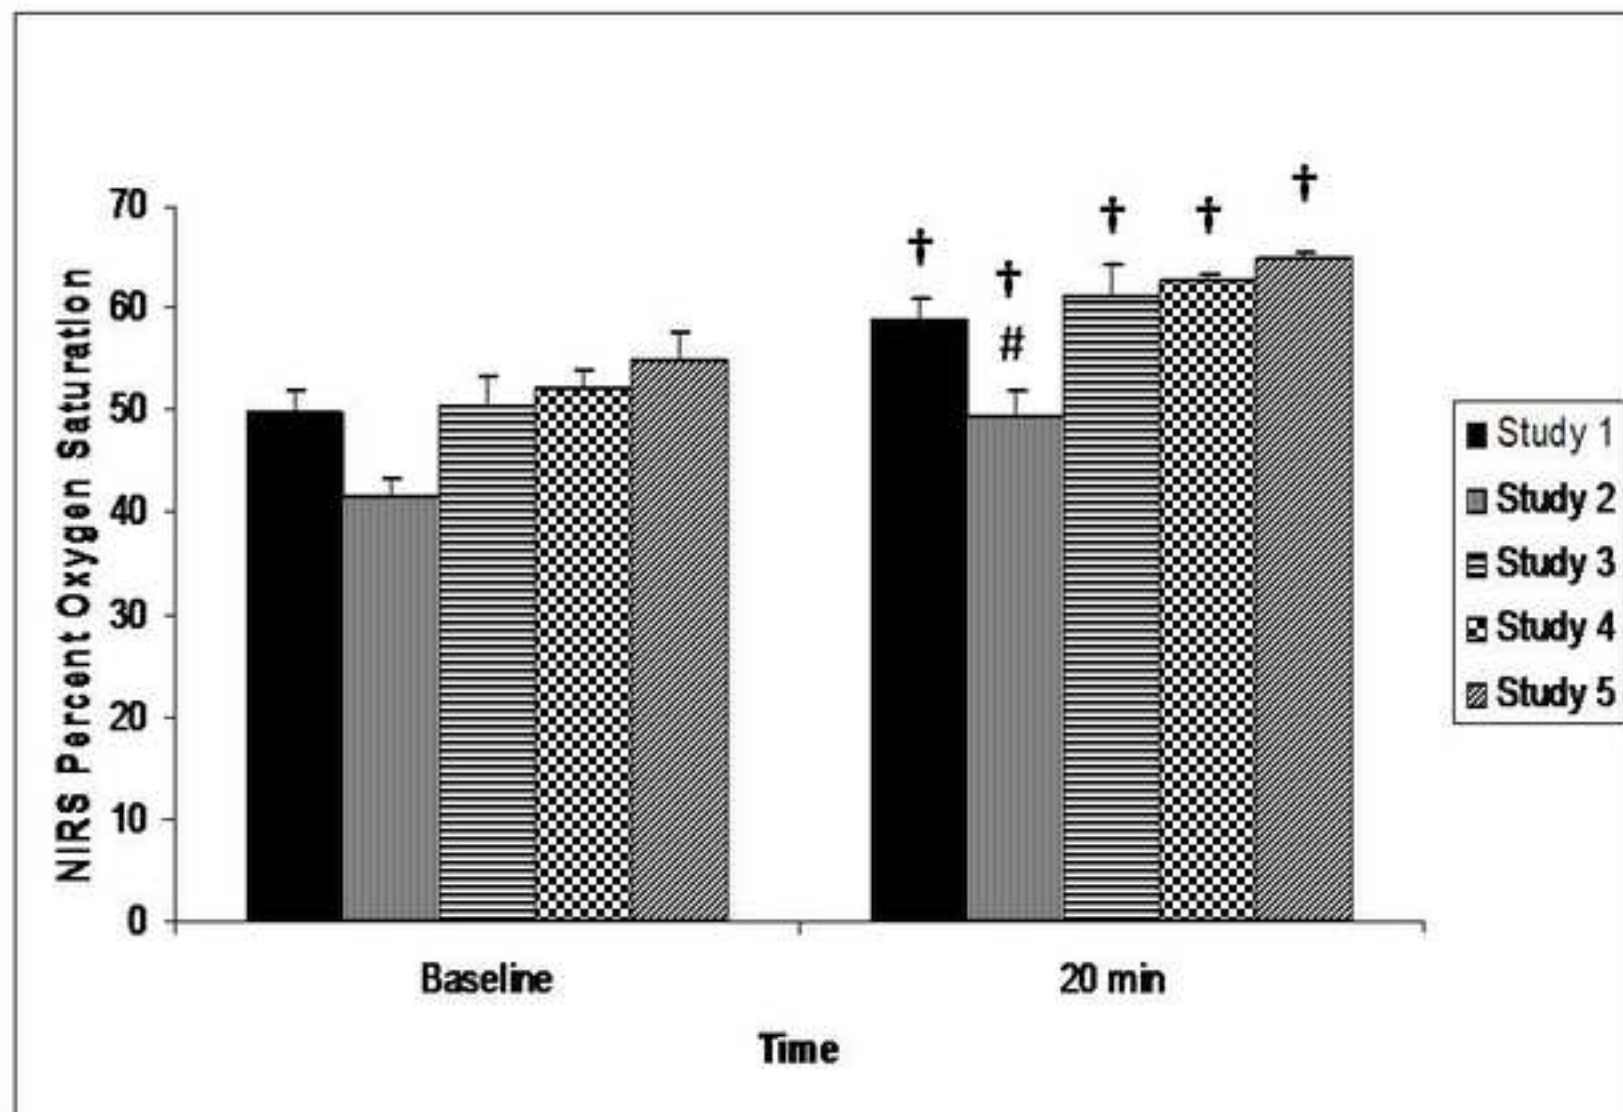

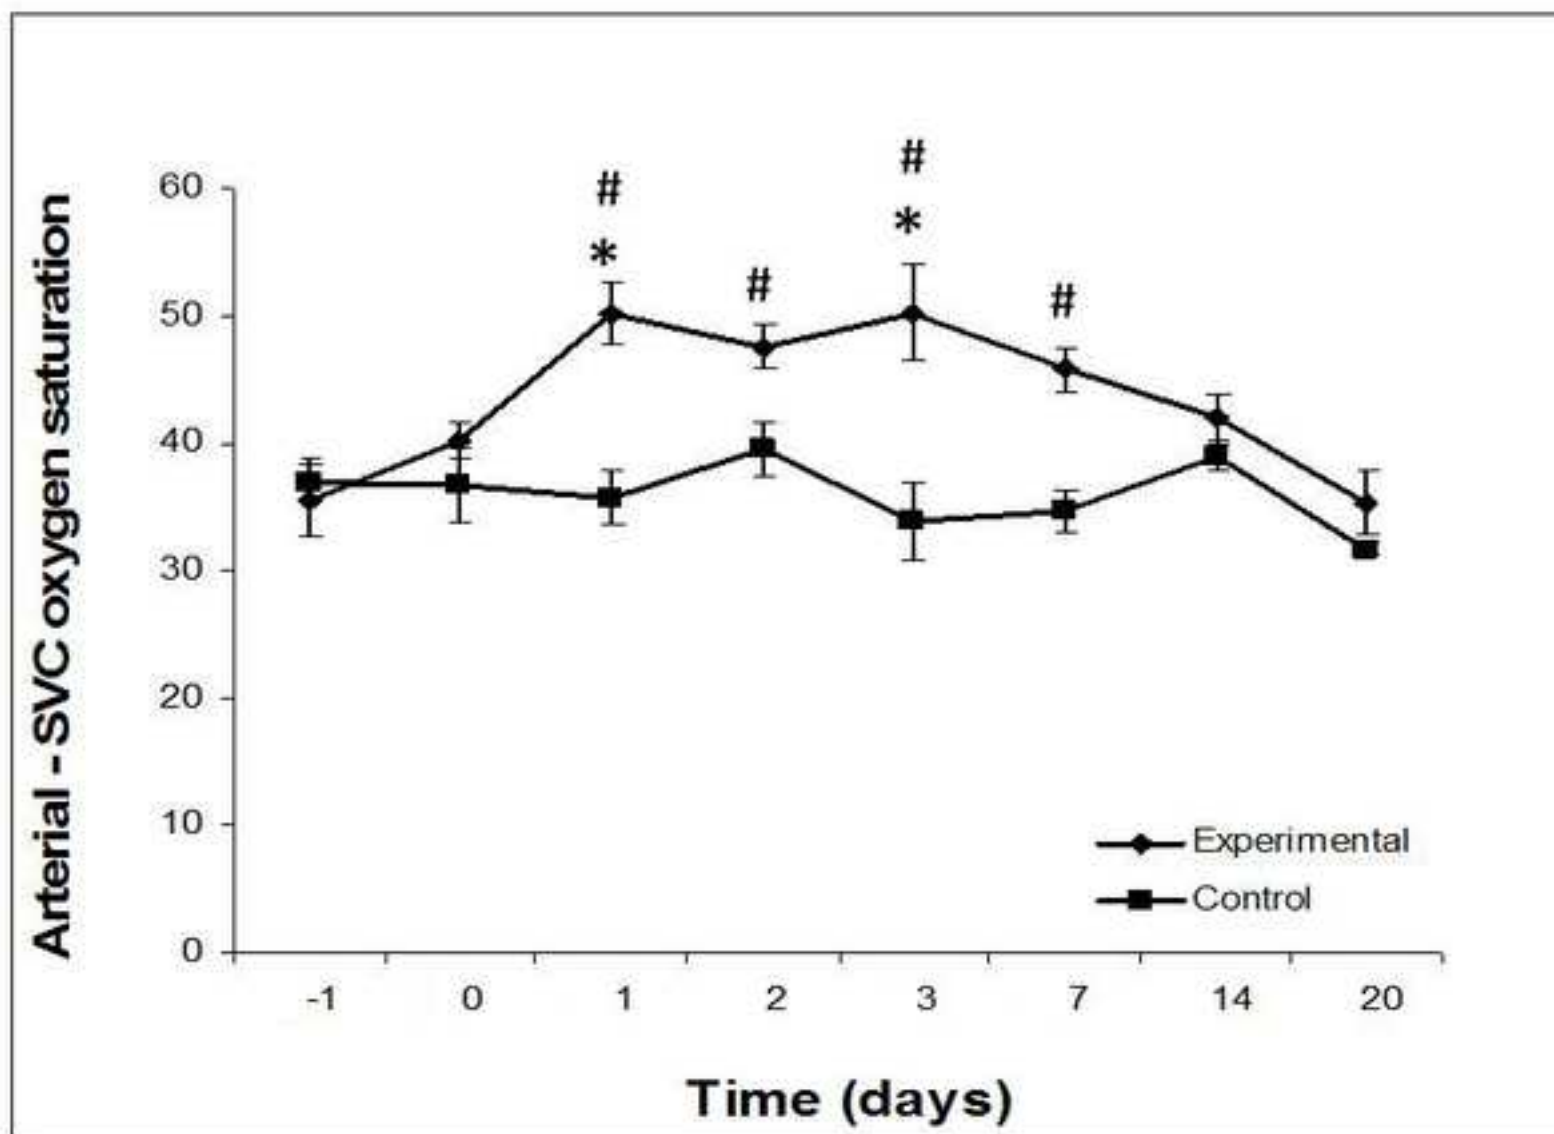

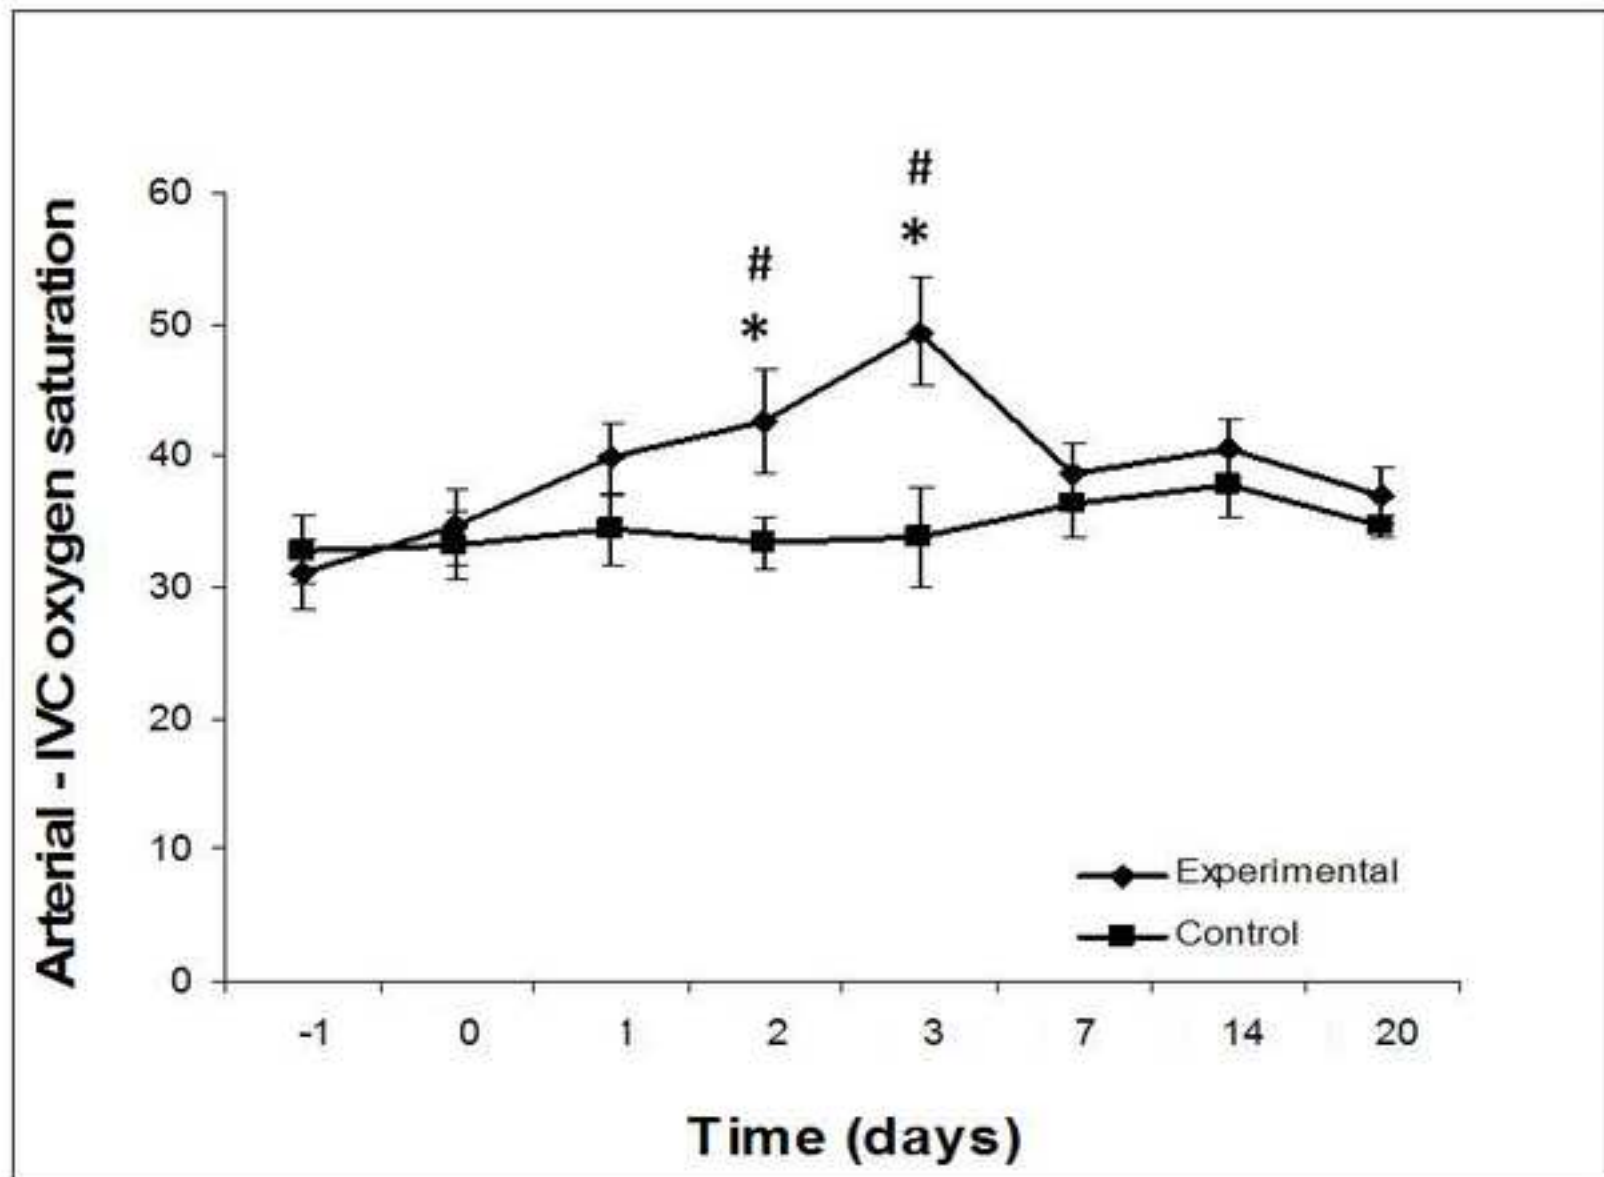

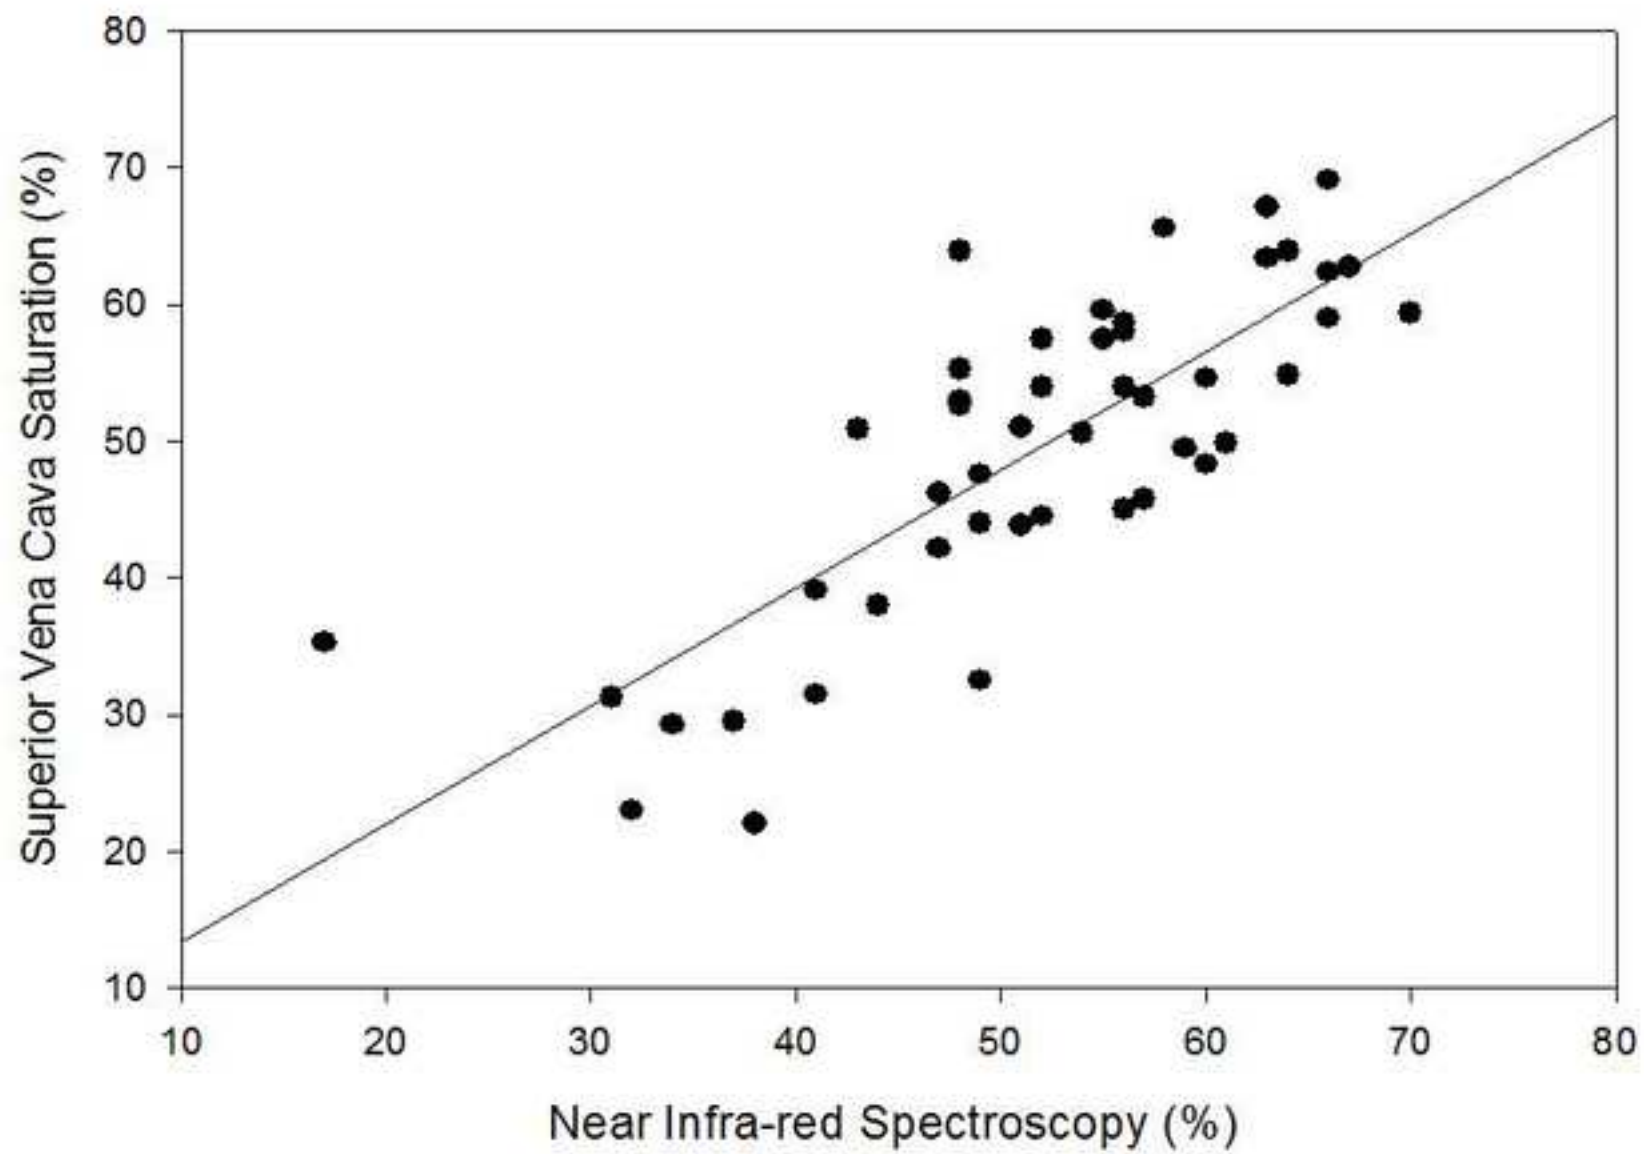

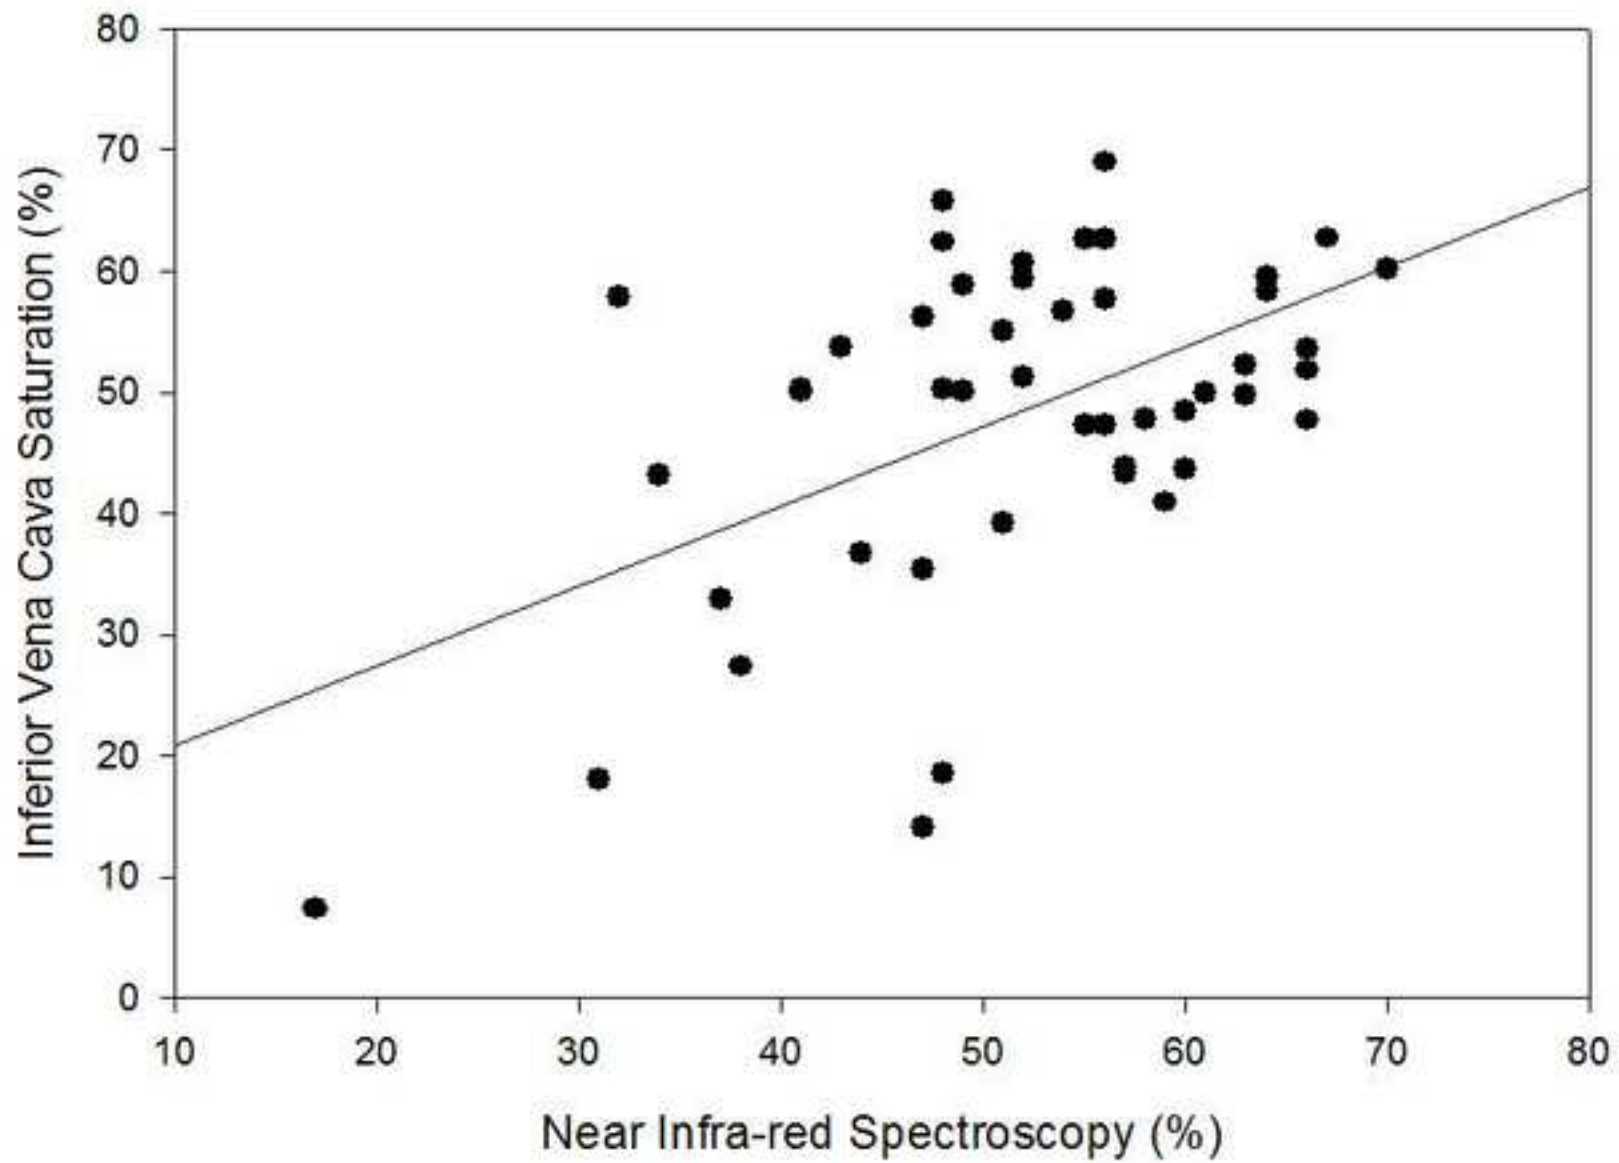

Table EI: Hemodynamic and Blood Gas Data

| Parameter                        |              | Group        | Baseline (Day 0 preintervention) |       | Day 1    |        |        | Day 3     |        |        |
|----------------------------------|--------------|--------------|----------------------------------|-------|----------|--------|--------|-----------|--------|--------|
|                                  |              |              | Value                            | II    | Value    | I      | II     | Value     | I      | II     |
| Heart Rate                       | <b>0.048</b> | Control      | 151±11.6                         | 0.391 | 145±18   | 0.865  | 0.868  | 138±39    | 0.641  | 0.274  |
|                                  |              | Experimental | 139±8.6                          |       | 148±31   | 0.075  |        | 122±31    | 0.987  |        |
| Systolic Blood Pressure          | 0.869        | Control      | 98±5                             | 0.510 | 103±3    | 0.988  | 0.053  | 100±7     | 0.992  | 0.130  |
|                                  |              | Experimental | 95±10                            |       | 94±10    | 0.996  |        | 93±9      | 0.996  |        |
| Diastolic Blood Pressure         | 0.982        | Control      | 76±6                             |       | 79±4     |        | NS     | 75±4      |        | NS     |
|                                  |              | Experimental | 76±7                             |       | 73±12    |        |        | 70±9      |        |        |
| Superior Vena Cava Pressure      | <0.001       | Control      | 5±2                              | 0.496 | 4±2      | 0.899  | <0.001 | 5±2       | 1.000  | <0.001 |
|                                  |              | Experimental | 4±2                              |       | 14±1     | <0.001 |        | 15±1      | <0.001 |        |
| Inferior Vena Cava Pressure      | <0.001       | Control      | 5±2                              | 0.339 | 3±2      | 0.199  | <0.001 | 5±3       | 0.999  | <0.001 |
|                                  |              | Experimental | 3±2                              |       | 15±1     | <0.001 |        | 15±1      | <0.001 |        |
| Cardiac Index                    | <0.001       | Control      | 4.2±0.9                          | 0.547 | 4.5±0.9  | 1.000  | 0.001  | 4.4±1.1   | 1.000  | 0.002  |
|                                  |              | Experimental | 3.9±1.0                          |       | 2.7±0.7  | <0.001 |        | 2.7±0.4   | <0.001 |        |
| Mean Pulmonary Arterial Pressure | 0.960        | Control      | 17±2                             | 0.156 | 16±1     | 0.935  | 0.351  | 17±1      | 0.970  | 0.139  |
|                                  |              | Experimental | 15±2                             |       | 15±2     | 0.999  |        | 15±2      | 0.995  |        |
| Right Atrial Pressure            | 0.169        | Control      | 3±2                              |       | 1.3±2.3  |        | NS     | 2±2.6     |        | NS     |
|                                  |              | Experimental | 0.8±1.8                          |       | -0.8±1.9 |        |        | 0.4±4     |        |        |
| Left Atrial Pressure             | 0.119        | Control      | 2.3±2.1                          |       | 2.5±1.9  |        | NS     | 1.8±2.2   |        | NS     |
|                                  |              | Experimental | 1.2±2.2                          |       | 0.8±3    |        |        | 0.7±2.7   |        |        |
| Pulmonary Vascular Resistance    | 0.001        | Control      | 9.4±2.6                          | 0.827 | 8.6±1.9  | 0.999  | 0.021  | 9.9±4.0   | 1.000  | 0.058  |
|                                  |              | Experimental | 9.9±3.2                          |       | 14.8±4.9 | 0.027  |        | 14.8±4.7  | 0.025  |        |
| Arterial Oxygen Saturation       | 0.255        | Control      | 89.5±4.7                         |       | 90.1±2.4 |        |        | 91±4.4    |        |        |
|                                  |              | Experimental | 89.7±5.2                         |       | 90.3±2.0 |        |        | 89.8±2.6  |        |        |
| SVC Oxygen Saturation            | 0.001        | Control      | 52.5±2.8                         | 0.651 | 54.4±4.0 | 0.984  | <0.001 | 57.1±3.7  | 0.839  | <0.001 |
|                                  |              | Experimental | 54.1±7.5                         |       | 40.1±7.5 | <0.001 |        | 39.6±8.7  | <0.001 |        |
| IVC Oxygen Saturation            | <0.001       | Control      | 56.7±7.1                         | 0.678 | 55.7±5.0 | 0.947  | 0.287  | 57.2±7.7  | 0.873  | 0.003  |
|                                  |              | Experimental | 58.7±4.6                         |       | 50.6±7.2 | 0.018  |        | 40.5±12.4 | <0.001 |        |
| Plasma Volume                    | 0.059        | Control      | 85.8±12                          | 0.876 | 87.3±14  | 0.945  | 0.444  | 87.8±13   | 0.972  | 0.058  |
|                                  |              | Experimental | 84.8±8.7                         |       | 92.3±13  | 0.059  |        | 100.7±7.3 | 0.002  |        |

Values expressed as mean ± s.d. Control group includes n=4 measurements; Experimental group includes n=6 measurements for all variables and time points. Columns headed by I are *p* values for within-group comparisons with baseline. Columns headed by II are *p* values for between-group comparisons. The column headed by III shows *p* values for two-way analysis of variance group effect for time. Significant *p* values are in bold. Blood pressure expressed in mmHg. Cardiac



index calculated as cardiac output/weight, expressed in units L/min/m<sup>2</sup>. Pulmonary vascular resistance calculated as  $(P_{PA} - P_{LA}) \times 80 / (\text{cardiac output/weight})$ , expressed as  $10^3 \text{ dynes} \cdot \text{cm}^{-5} \cdot \text{kg}$ . Oxygen saturation expressed as percent saturation. Blood volume expressed mL/kg.

| Parameter                        | Group               | Week-1 Day 7    |              |              | Week-2 Day 14   |              |              | Week-3 Day 21  |              |              |
|----------------------------------|---------------------|-----------------|--------------|--------------|-----------------|--------------|--------------|----------------|--------------|--------------|
|                                  |                     | Value           | I            | II           | Value           | I            | II           | Value          | I            | II           |
| Heart Rate                       | Control             | 128±21          | 0.458        | 0.827        | 111±11          | <b>0.028</b> | 0.89         | 103±23         | <b>0.006</b> | 0.297        |
|                                  | Experimental        | 124±15          | 0.972        |              | 113±16          | 0.908        |              | 119±20         | 0.967        |              |
| Systolic Blood Pressure          | Control             | 94±5            | 0.657        | 0.762        | 98±7            | 0.898        | 0.844        | 99±9           | 0.949        | 0.303        |
|                                  | Experimental        | 95±8            | 1.000        |              | 97±6            | 0.954        |              | 94±4           | 0.997        |              |
| Diastolic Blood Pressure         | Control             | 74±3            |              | NS           | 76±5            |              | NS           | 75±6           |              | NS           |
|                                  | Experimental        | 73±8            |              |              | 75±6            |              |              | 71±5           |              |              |
| Superior Vena Cava Pressure      | Control             | 5±1             | 0.999        | <0.001       | 5±2             | 0.880        | <0.001       | 3±2            | 0.316        | <0.001       |
|                                  | Experimental        | 14±1            | <0.001       |              | 14±1            | <0.001       |              | 14±2           | <0.001       |              |
| Inferior Vena Cava Pressure      | Control             | 5±1             | 0.993        | <0.001       | 7±4             | 0.955        | <0.001       | 5±4            | 0.998        | <0.001       |
|                                  | Experimental        | 14±1            | <0.001       |              | 15±1            | <0.001       |              | 15±1           | <0.001       |              |
| Cardiac Index                    | Control             | 4.2±0.7         | 1.000        | 0.038        | 4.2±0.9         | 0.999        | 0.074        | 4.0±0.6        | 0.775        | 0.789        |
|                                  | Experimental        | 3.2±0.7         | 0.129        |              | 3.3±0.9         | 0.302        |              | 3.9±0.7        | 0.977        |              |
| Mean Pulmonary Arterial Pressure | Control             | 20±4            | 0.718        | 0.023        | 17±1            | 0.965        | 0.124        | 17±1           | 0.990        | 0.194        |
|                                  | Experimental        | 16±3            | 0.944        |              | 15±2            | 0.995        |              | 15±2           | 0.981        |              |
| <b>Right Atrial Pressure</b>     | <b>Control</b>      | <b>4.7±3.2</b>  |              |              | <b>2.3±3.5</b>  |              |              | <b>2.7±2.3</b> |              |              |
|                                  | <b>Experimental</b> | <b>-0.2±1.8</b> |              | NS           | <b>-0.2±2.5</b> |              | NS           | <b>1.4±1.7</b> |              | NS           |
| <b>Left Atrial Pressure</b>      | <b>Control</b>      | <b>3.5±2.6</b>  |              |              | <b>3±2.8</b>    |              |              | <b>3.3±3.2</b> |              |              |
|                                  | <b>Experimental</b> | <b>0±1.3</b>    |              | NS           | <b>0±0.6</b>    |              | NS           | <b>2.5±2.6</b> |              | NS           |
| Pulmonary Vascular Resistance    | Control             | 10.7±4.1        | 0.999        | 0.134        | 9.3±3.4         | 1.000        | 0.159        | 9.5±2.5        | 1.000        | 0.895        |
|                                  | Experimental        | 14.5±5.1        | <b>0.036</b> |              | 12.8±3.8        | 0.308        |              | 9.2±3.1        | 0.941        |              |
| Arterial Oxygen Saturation       | Control             | 91.4±3.9        |              |              | 92.8±1.3        |              |              | 91.2±0.6       |              |              |
|                                  | Experimental        | 90±2.9          |              |              | 90.6±2.5        |              |              | 88.1±2.7       |              |              |
| SVC Oxygen Saturation            | Control             | 56.7±1.3        | <b>0.009</b> | <b>0.001</b> | 53.7±3.4        | 0.985        | 0.165        | 59.5±0.9       | 0.487        | 0.057        |
|                                  | Experimental        | 44.2±6.9        | 0.835        |              | 48.7±5.1        | 0.240        |              | 52.7±7.4       | 0.516        |              |
| IVC Oxygen Saturation            | Control             | 55.1±7.4        | 0.985        | 0.436        | 55.1±6.2        | 0.957        | 0.312        | 56.5±1.2       | 0.817        | 0.206        |
|                                  | Experimental        | 51.3±7.1        | <b>0.027</b> |              | 50.2±5.4        | <b>0.018</b> |              | 51.2±5.0       | <b>0.030</b> |              |
| Plasma Volume                    | Control             | 86.8±4.7        | 0.841        | 0.072        | 87.9±9.1        | 0.992        | <b>0.020</b> | 85.5±8.4       | 0.950        | <b>0.034</b> |
|                                  | Experimental        | 98.8±7          | <b>0.002</b> |              | 104±8.5         | <0.001       |              | 100±9.4        | <b>0.002</b> |              |

Table EI: Hemodynamic and Blood Gas Data

| Parameter                        |                  | Group        | Baseline (Day 0 preintervention) |       | Day 1    |                  |                  | Day 3     |                  |                  |
|----------------------------------|------------------|--------------|----------------------------------|-------|----------|------------------|------------------|-----------|------------------|------------------|
|                                  | III              |              | Value                            | II    | Value    | I                | II               | Value     | I                | II               |
| Heart Rate                       | <b>0.048</b>     | Control      | 151±11.6                         | 0.391 | 145±18   | 0.865            | 0.868            | 138±39    | 0.641            | 0.274            |
|                                  |                  | Experimental | 139±8.6                          |       | 148±31   | 0.075            |                  | 122±31    | 0.987            |                  |
| Systolic Blood Pressure          | 0.869            | Control      | 98±5                             | 0.510 | 103±3    | 0.988            | 0.053            | 100±7     | 0.992            | 0.130            |
|                                  |                  | Experimental | 95±10                            |       | 94±10    | 0.996            |                  | 93±9      | 0.996            |                  |
| Diastolic Blood Pressure         | 0.982            | Control      | 76±6                             |       | 79±4     |                  | NS               | 75±4      |                  | NS               |
|                                  |                  | Experimental | 76±7                             |       | 73±12    |                  |                  | 70±9      |                  |                  |
| Superior Vena Cava Pressure      | <b>&lt;0.001</b> | Control      | 5±2                              | 0.496 | 4±2      | 0.899            | <b>&lt;0.001</b> | 5±2       | 1.000            | <b>&lt;0.001</b> |
|                                  |                  | Experimental | 4±2                              |       | 14±1     | <b>&lt;0.001</b> |                  | 15±1      | <b>&lt;0.001</b> |                  |
| Inferior Vena Cava Pressure      | <b>&lt;0.001</b> | Control      | 5±2                              | 0.339 | 3±2      | 0.199            | <b>&lt;0.001</b> | 5±3       | 0.999            | <b>&lt;0.001</b> |
|                                  |                  | Experimental | 3±2                              |       | 15±1     | <b>&lt;0.001</b> |                  | 15±1      | <b>&lt;0.001</b> |                  |
| Cardiac Index                    | <b>&lt;0.001</b> | Control      | 4.2±0.9                          | 0.547 | 4.5±0.9  | 1.000            | <b>0.001</b>     | 4.4±1.1   | 1.000            | <b>0.002</b>     |
|                                  |                  | Experimental | 3.9±1.0                          |       | 2.7±0.7  | <b>&lt;0.001</b> |                  | 2.7±0.4   | <b>&lt;0.001</b> |                  |
| Mean Pulmonary Arterial Pressure | 0.960            | Control      | 17±2                             | 0.156 | 16±1     | 0.935            | 0.351            | 17±1      | 0.970            | 0.139            |
|                                  |                  | Experimental | 15±2                             |       | 15±2     | 0.999            |                  | 15±2      | 0.995            |                  |
| Right Atrial Pressure            | 0.169            | Control      | 3±2                              |       | 1.3±2.3  |                  | NS               | 2±2.6     |                  | NS               |
|                                  |                  | Experimental | 0.8±1.8                          |       | -0.8±1.9 |                  |                  | 0.4±4     |                  |                  |
| Left Atrial Pressure             | 0.119            | Control      | 2.3±2.1                          |       | 2.5±1.9  |                  | NS               | 1.8±2.2   |                  | NS               |
|                                  |                  | Experimental | 1.2±2.2                          |       | 0.8±3    |                  |                  | 0.7±2.7   |                  |                  |
| Pulmonary Vascular Resistance    | <b>0.001</b>     | Control      | 9.4±2.6                          | 0.827 | 8.6±1.9  | 0.999            | <b>0.021</b>     | 9.9±4.0   | 1.000            | 0.058            |
|                                  |                  | Experimental | 9.9±3.2                          |       | 14.8±4.9 | <b>0.027</b>     |                  | 14.8±4.7  | <b>0.025</b>     |                  |
| Arterial Oxygen Saturation       | 0.255            | Control      | 89.5±4.7                         |       | 90.1±2.4 |                  |                  | 91±4.4    |                  |                  |
|                                  |                  | Experimental | 89.7±5.2                         |       | 90.3±2.0 |                  |                  | 89.8±2.6  |                  |                  |
| SVC Oxygen Saturation            | <b>0.001</b>     | Control      | 52.5±2.8                         | 0.651 | 54.4±4.0 | 0.984            | <b>&lt;0.001</b> | 57.1±3.7  | 0.839            | <b>&lt;0.001</b> |
|                                  |                  | Experimental | 54.1±7.5                         |       | 40.1±7.5 | <b>&lt;0.001</b> |                  | 39.6±8.7  | <b>&lt;0.001</b> |                  |
| IVC Oxygen Saturation            | <b>&lt;0.001</b> | Control      | 56.7±7.1                         | 0.678 | 55.7±5.0 | 0.947            | 0.287            | 57.2±7.7  | 0.873            | <b>0.003</b>     |
|                                  |                  | Experimental | 58.7±4.6                         |       | 50.6±7.2 | <b>0.018</b>     |                  | 40.5±12.4 | <b>&lt;0.001</b> |                  |
| Plasma Volume                    | 0.059            | Control      | 85.8±12                          | 0.876 | 87.3±14  | 0.945            | 0.444            | 87.8±13   | 0.972            | 0.058            |
|                                  |                  | Experimental | 84.8±8.7                         |       | 92.3±13  | 0.059            |                  | 100.7±7.3 | <b>0.002</b>     |                  |

Values expressed as mean ± s.d. Control group includes n=4 measurements; Experimental group includes n=6 measurements for all variables and time points. Columns headed by I are *p* values for within-group comparisons with baseline. Columns headed by II are *p* values for between-group comparisons. The column headed by III shows *p* values for two-way analysis of variance group effect for time. Significant *p* values are in bold. Blood pressure expressed in mmHg. Cardiac index calculated as cardiac output/weight, expressed in units L/min/m<sup>2</sup>. Pulmonary vascular resistance calculated as (P<sub>PA</sub> - P<sub>LA</sub>) x 80/(cardiac output/weight), expressed as 10<sup>3</sup> dynes · cm<sup>-5</sup> · kg. Oxygen saturation expressed as percent saturation. Blood volume expressed mL/kg.

| Parameter                        | Group        | Day 7    |        |        | Day 14   |              |        | Day 21   |              |        |
|----------------------------------|--------------|----------|--------|--------|----------|--------------|--------|----------|--------------|--------|
|                                  |              | Value    | I      | II     | Value    | I            | II     | Value    | I            | II     |
| Heart Rate                       | Control      | 128±21   | 0.458  | 0.827  | 111±11   | <b>0.028</b> | 0.89   | 103±23   | <b>0.006</b> | 0.297  |
|                                  | Experimental | 124±15   | 0.972  |        | 113±16   | 0.908        |        | 119±20   | 0.967        |        |
| Systolic Blood Pressure          | Control      | 94±5     | 0.657  | 0.762  | 98±7     | 0.898        | 0.844  | 99±9     | 0.949        | 0.303  |
|                                  | Experimental | 95±8     | 1.000  |        | 97±6     | 0.954        |        | 94±4     | 0.997        |        |
| Diastolic Blood Pressure         | Control      | 74±3     | NS     | NS     | 76±5     | NS           | NS     | 75±6     | NS           | NS     |
|                                  | Experimental | 73±8     |        |        | 75±6     |              |        | 71±5     |              |        |
| Superior Vena Cava Pressure      | Control      | 5±1      | 0.999  | <0.001 | 5±2      | 0.880        | <0.001 | 3±2      | 0.316        | <0.001 |
|                                  | Experimental | 14±1     | <0.001 |        | 14±1     | <0.001       |        | 14±2     | <0.001       |        |
| Inferior Vena Cava Pressure      | Control      | 5±1      | 0.993  | <0.001 | 7±4      | 0.955        | <0.001 | 5±4      | 0.998        | <0.001 |
|                                  | Experimental | 14±1     | <0.001 |        | 15±1     | <0.001       |        | 15±1     | <0.001       |        |
| Cardiac Index                    | Control      | 4.2±0.7  | 1.000  | 0.038  | 4.2±0.9  | 0.999        | 0.074  | 4.0±0.6  | 0.775        | 0.789  |
|                                  | Experimental | 3.2±0.7  | 0.129  |        | 3.3±0.9  | 0.302        |        | 3.9±0.7  | 0.977        |        |
| Mean Pulmonary Arterial Pressure | Control      | 20±4     | 0.718  | 0.023  | 17±1     | 0.965        | 0.124  | 17±1     | 0.990        | 0.194  |
|                                  | Experimental | 16±3     | 0.944  |        | 15±2     | 0.995        |        | 15±2     | 0.981        |        |
| Right Atrial Pressure            | Control      | 4.7±3.2  | NS     | NS     | 2.3±3.5  | NS           | NS     | 2.7±2.3  | NS           | NS     |
|                                  | Experimental | -0.2±1.8 |        |        | -0.2±2.5 |              |        | 1.4±1.7  |              |        |
| Left Atrial Pressure             | Control      | 3.5±2.6  | NS     | NS     | 3±2.8    | NS           | NS     | 3.3±3.2  | NS           | NS     |
|                                  | Experimental | 0±1.3    |        |        | 0±0.6    |              |        | 2.5±2.6  |              |        |
| Pulmonary Vascular Resistance    | Control      | 10.7±4.1 | 0.999  | 0.134  | 9.3±3.4  | 1.000        | 0.159  | 9.5±2.5  | 1.000        | 0.895  |
|                                  | Experimental | 14.5±5.1 | 0.036  |        | 12.8±3.8 | 0.308        |        | 9.2±3.1  | 0.941        |        |
| Arterial Oxygen Saturation       | Control      | 91.4±3.9 | 0.009  | 0.001  | 92.8±1.3 | 0.985        | 0.165  | 91.2±0.6 | 0.487        | 0.057  |
|                                  | Experimental | 90±2.9   |        |        | 90.6±2.5 |              |        | 88.1±2.7 |              |        |
| SVC Oxygen Saturation            | Control      | 56.7±1.3 | 0.835  | 0.001  | 53.7±3.4 | 0.240        | 0.312  | 59.5±0.9 | 0.516        | 0.206  |
|                                  | Experimental | 44.2±6.9 | 0.985  |        | 48.7±5.1 | 0.957        |        | 52.7±7.4 | 0.817        |        |
| IVC Oxygen Saturation            | Control      | 55.1±7.4 | 0.027  | 0.436  | 55.1±6.2 | 0.018        | 0.312  | 56.5±1.2 | 0.030        | 0.206  |
|                                  | Experimental | 51.3±7.1 | 0.841  |        | 50.2±5.4 | 0.992        |        | 51.2±5.0 | 0.950        |        |
| Plasma Volume                    | Control      | 86.8±4.7 | 0.841  | 0.072  | 87.9±9.1 | 0.992        | 0.020  | 85.5±8.4 | 0.950        | 0.034  |
|                                  | Experimental | 98.8±7   | 0.002  |        | 104±8.5  | <0.001       |        | 100±9.4  | 0.002        |        |

Table EII: Serum neurohormonal markers.

|                           | Group        | Study 1<br>(Day -1) | Postintervention<br>(Day 0) | Study 2 (Day 3) | Study 3 (Day 7) | Study 4 (Day 14) | Study 5 (Day 21) |
|---------------------------|--------------|---------------------|-----------------------------|-----------------|-----------------|------------------|------------------|
| ADH<br>(pg/ml)            | Control      | 1.15 ± 1.11         | 2.11 ± 0.9                  | 1.64 ± 1.13     | 2 ± 0.83        | 2.72 ± 1.07      | 2.85 ± 0.64      |
|                           | Experimental | 2.6 ± 1.03          | 21.14 ± 38.64               | 3.82 ± 2.31     | 4.39 ± 1.82     | 3.1 ± 2.31       | 3.43 ± 2.09      |
| Aldosterone<br>(pg/ml)    | Control      | 58.2 ± 18.59        | 41.68 ± 42.43               | 59.44 ± 41.88   | 17.82 ± 27.55   | 16.62 ± 22.09    | 47.78 ± 56.15    |
|                           | Experimental | 106.7 ± 116.9       | 252.3 ± 230.4               | 284.7 ± 230.1   | 58.6 ± 86.8     | 107.2 ± 203.8    | 32.5 ± 32.5      |
| Angiotensin II<br>(pg/ml) | Control      | 506.5 ± 306         | 601 ± 206.8                 | 518.6 ± 174.1   | 424.1 ± 108.4   | 474.3 ± 230.9    | 550.1 ± 160.7    |
|                           | Experimental | 1610.1 ± 701.3      | 3261.2 ± 2394.3             | 4576.8 ± 3894.5 | 2840.6 ± 2528.7 | 1745.4 ± 1337.4  | 1759.3 ± 1109.5  |
| BNP<br>(ng/ml)            | Control      | 0.25 ± 0.03         | 0.26 ± 0.06                 | 0.31 ± 0.08     | 0.32 ± 0.12     | 0.38 ± 0.12      | 0.33 ± 0.1       |
|                           | Experimental | 0.3 ± 0.07          | 0.22 ± 0.03                 | 0.21 ± 0.02     | 0.27 ± 0.08     | 0.27 ± 0.05      | 0.28 ± 0.03      |
| Epinephrine<br>(ng/ml)    | Control      | 0.09 ± 0.05         | 0.05 ± 0.05                 | 0.07 ± 0.05     | 0.04 ± 0.03     | 0.09 ± 0.09      | 0.07 ± 0.09      |
|                           | Experimental | 0.08 ± 0.03         | 0.15 ± 0.09                 | 0.11 ± 0.07     | 0.02 ± 0.02     | 0.00 ± 0.01      | 0.01 ± 0.02      |
| Norepinephrine<br>(ng/ml) | Control      | 0.58 ± 0.29         | 0.42 ± 0.22                 | 0.63 ± 0.22     | 0.51 ± 0.38     | 0.61 ± 0.5       | 0.58 ± 0.44      |
|                           | Experimental | 1.25 ± 0.75         | 1.2 ± 0.88                  | 1.48 ± 1.36     | 0.97 ± 0.69     | 0.22 ± 0.16      | 0.47 ± 0.26      |

Values expressed as mean ± s.d. Control group includes n = 4 measurements and experimental group includes n = 5 measurements for all variables and time points, except Angiotensin II, for which n = 3 in the experimental group.

Table EII: Serum neurohormonal markers.

|                           | Group        | Study 1<br>(Day -1) | Postintervention<br>(Day 0) | Study 2 (Day 3) | Study 3 (Day 7) | Study 4 (Day<br>14) | Study 5 (Day<br>21) |
|---------------------------|--------------|---------------------|-----------------------------|-----------------|-----------------|---------------------|---------------------|
| ADH<br>(pg/ml)            | Control      | 1.15 ± 1.11         | 2.11 ± 0.9                  | 1.64 ± 1.13     | 2 ± 0.83        | 2.72 ± 1.07         | 2.85 ± 0.64         |
|                           | Experimental | 2.6 ± 1.03          | 21.14 ± 38.64               | 3.82 ± 2.31     | 4.39 ± 1.82     | 3.1 ± 2.31          | 3.43 ± 2.09         |
| Aldosterone<br>(pg/ml)    | Control      | 58.2 ± 18.59        | 41.68 ± 42.43               | 59.44 ± 41.88   | 17.82 ± 27.55   | 16.62 ± 22.09       | 47.78 ± 56.15       |
|                           | Experimental | 106.7 ± 116.9       | 252.3 ± 230.4               | 284.7 ± 230.1   | 58.6 ± 86.8     | 107.2 ± 203.8       | 32.5 ± 32.5         |
| Angiotensin II<br>(pg/ml) | Control      | 506.5 ± 306         | 601 ± 206.8                 | 518.6 ± 174.1   | 424.1 ± 108.4   | 474.3 ± 230.9       | 550.1 ± 160.7       |
|                           | Experimental | 1610.1 ± 701.3      | 3261.2 ± 2394.3             | 4576.8 ± 3894.5 | 2840.6 ± 2528.7 | 1745.4 ± 1337.4     | 1759.3 ± 1109.5     |
| BNP<br>(ng/ml)            | Control      | 0.25 ± 0.03         | 0.26 ± 0.06                 | 0.31 ± 0.08     | 0.32 ± 0.12     | 0.38 ± 0.12         | 0.33 ± 0.1          |
|                           | Experimental | 0.3 ± 0.07          | 0.22 ± 0.03                 | 0.21 ± 0.02     | 0.27 ± 0.08     | 0.27 ± 0.05         | 0.28 ± 0.03         |
| Epinephrine<br>(ng/ml)    | Control      | 0.09 ± 0.05         | 0.05 ± 0.05                 | 0.07 ± 0.05     | 0.04 ± 0.03     | 0.09 ± 0.09         | 0.07 ± 0.09         |
|                           | Experimental | 0.08 ± 0.03         | 0.15 ± 0.09                 | 0.11 ± 0.07     | 0.02 ± 0.02     | 0.00 ± 0.01         | 0.01 ± 0.02         |
| Norepinephrine<br>(ng/ml) | Control      | 0.58 ± 0.29         | 0.42 ± 0.22                 | 0.63 ± 0.22     | 0.51 ± 0.38     | 0.61 ± 0.5          | 0.58 ± 0.44         |
|                           | Experimental | 1.25 ± 0.75         | 1.2 ± 0.88                  | 1.48 ± 1.36     | 0.97 ± 0.69     | 0.22 ± 0.16         | 0.47 ± 0.26         |

Values expressed as mean ± s.d. Control group includes n = 4 measurements and experimental group includes n = 5 measurements for all variables and time points, except Angiotensin II, for which n = 3 in the experimental group.
